# Supplementary material
Source: ML conference proceedings conference paper supplement (https://proceedings.neurips.cc/paper_files/paper/2019/hash/148148d62be67e0916a833931bd32b26-Abstract.html)
Supplement: Supplementary file [file 148148d62be67e0916a833931bd32b26-Supplemental.zip]

## 306 A Supplementary material: missing proofs

### 307 A.1 Proof of Lemma 5

308 *Proof.* From the Davis-Kahan sin  $\Theta$  theorem,  $\|\hat{\Pi} - \Pi\|_2 \leq 2\|E\|_2/\Delta_k$  therefore  $\|\hat{\Pi} - \Pi\|_F \leq$   
 309  $2\sqrt{k}\|E\|_2/\Delta_k$ . This implies that  $\hat{\Pi} = \Pi + E'$ , where  $E' \in \mathbb{R}^{d \times d}$  and  $\|E'\|_F \leq 2\sqrt{k}\|E\|_2/\Delta_k$ .  
 310 Then

$$\begin{aligned}\hat{A}_k - A_k &= \hat{\Pi}(A + E) - A_k \\ &= (\Pi + E')(A + E) - A_k \\ &= \Pi E + E' A + E' E\end{aligned}$$

311 Third equation is from the fact that  $\Pi A = A_k$ . Thus the  $H$  in the statement can be set to  $E' A + E' E$ .  
 312 Let us bound its norm. We have  $\|E' A\|_F \leq \|E'\|_F \|A\|_2 = \lambda_1 \|E'\|_F$ .<sup>3</sup> The next term can similarly  
 313 be bounded by  $\|E'\|_F \|E\|_2$ . Combining these implies the claim.  $\square$

### 314 A.2 Proof of Lemma 7

315 *Proof.* The proof requires relating  $A_k$ , because it is easier to obtain a bound on  $\left\| \|\hat{A}_k - A_k\|_F \right\|_{\psi_1}$ .

316 Let us write  $\hat{A}_k - A^*$  as  $(\hat{A}_k - A_k) + (A_k - A^*)$ . As in the proof of Lemma 5,

$$\begin{aligned}\|\hat{A}_k - A_k\|_F &= \|\hat{\Pi}(A + E) - \Pi A\|_F \\ &\leq \|(\hat{\Pi} - \Pi)A\|_F + \|\hat{\Pi}E\|_F \\ &\leq \|\hat{\Pi} - \Pi\|_F \lambda_1 + \sqrt{k}\|E\|_2 \leq \frac{2\sqrt{k}\lambda_1\|E\|_2}{\Delta_k} + \sqrt{k}\|E\|_2 \leq \frac{3\sqrt{k}\lambda_1\|E\|_2}{\Delta_k}.\end{aligned}$$

317 Now for the second term, using triangle inequality,

$$\begin{aligned}\|A^* - A_k\|_F &= \|\mathbb{E}[\hat{A}_k - A_k]\|_F \leq \mathbb{E}[\|\hat{A}_k - A_k\|_F] \\ &\leq \left\| \|\hat{A}_k - A_k\|_F \right\|_{\psi_1} \leq \frac{3\sqrt{k}\lambda_1\|E\|_2}{\Delta_k}.\end{aligned}$$

318 Thus we have

$$\left\| \|\hat{A}_k - A^*\|_F \right\|_{\psi_1} \leq \left\| \|\hat{A}_k - A_k\|_F \right\|_{\psi_1} + \|A^* - A_k\|_F \leq \frac{6\sqrt{k}\lambda_1\|E\|_2}{\Delta_k}.$$

319 Using Lemma 3 from [6] now completes the proof.  $\square$

### 320 A.3 Proof of Theorem 8

*Proof.*

$$\|\tilde{A}_k - A^*\|_F = \left\| \frac{1}{m} \sum_{i=1}^m \hat{A}_k^{(i)} - A^* \right\|_F$$

321  $\hat{A}_k^{(i)} - A^* \in \mathbb{R}^{d \times d}$ . Let us define  $Y_i$  as a  $\mathbb{R}^{d^2}$  vector which is equal to the flattened  $\hat{A}_k^{(i)} - A^*$  matrix.  
 322 Now  $\left\| \frac{1}{m} \sum_{i=1}^m Y_i \right\| = \left\| \frac{1}{m} \sum_{i=1}^m \hat{A}_k^{(i)} - A^* \right\|_F$ .  $\mathbb{E}[Y_i] = 0$  and  $\left\| Y_i \right\|_{\psi_1} \leq C_1 \frac{\lambda_1}{\Delta_k} \sqrt{\frac{k\lambda_1 \text{Tr}(A)}{n}}$  for a  
 323 constant  $C_1$ . Using Lemma 4 in [6] (which is a consequence of Theorem 2.5 of [3]), for a constant

<sup>3</sup>For any matrices  $X, Y$ ,  $\|XY\|_F \leq \|X\|_F \|Y\|_2$ . (This is easy to show, by observing how  $Y$  acts on the rows of  $X$ .)

324  $C_2$

$$\begin{aligned} \left\| \frac{1}{m} \sum_{i=1}^m Y_i \right\|_{\psi_1} &= \left\| \sum_{i=1}^m \frac{Y_i}{m} \right\|_{\psi_1} \\ &\leq \sqrt{\sum_{i=1}^m \frac{1}{m^2} C_1^2 \frac{\lambda_1^2}{\Delta_k^2} \cdot \frac{k\lambda_1 \text{Tr}(A)}{n}} \\ &\leq C_2 \frac{\lambda_1}{\Delta_k} \sqrt{\frac{k\lambda_1 \text{Tr}(A)}{mn}} \end{aligned}$$

325 This completes the proof.  $\square$

#### 326 A.4 Proof of Theorem 9

327 *Proof.* Let us define  $\tilde{B}_k = \frac{1}{m} \sum_{i \in [m]} \hat{A}^{(i)} - \hat{A}_k^{(i)}$ . By definition,  $\tilde{B}_k = \tilde{A} - \tilde{A}_k$ , where  $\tilde{A}$  is simply  
328  $\frac{1}{m} \sum_{i \in [m]} \hat{A}^{(i)}$ . We start by showing some basic properties about  $\tilde{A}$ ,  $\tilde{A}_k$  and  $\tilde{B}_k$ .

329 First, note that  $\tilde{A}$  is the empirical average (over  $m$  machines) of  $\hat{A}^{(i)}$ , and each such matrix is the  
330 empirical average (over  $n$ ) samples of  $xx^T$ . Since samples across and within machines are all i.i.d.,  
331 the difference  $A - \tilde{A}$  is simply the error in the estimate of  $A$  using  $mn$  i.i.d. samples  $x \sim \mathcal{D}$ . Thus,  
332 using Lemma 3 of [6], we have

$$\left\| A - \tilde{A} \right\|_{\psi_1} \leq C \sqrt{\frac{\lambda_1 \text{Tr}(A)}{mn}}. \quad (5)$$

333 From Theorem 1, we have that for any  $\delta > 0$ , with probability at least  $1 - \delta$ ,

$$\|A_k - \tilde{A}_k\|_F \leq \left( \frac{\kappa_1}{n} + \frac{\kappa_2}{\sqrt{mn}} \right) \log(1/\delta). \quad (6)$$

334 Let  $\Pi$  denote the projection matrix onto the span of the top  $k$  SVD directions of  $A$ , and  $\Pi^\perp = I - \Pi$ .  
335 We will also denote  $\kappa = \frac{\kappa_1}{n} + \frac{\kappa_2}{\sqrt{mn}}$ , for convenience.

336 Next, we claim that  $\|\Pi \tilde{B}_k\|$  is  $O(\kappa \log(1/\delta))$  with high probability. To see this, write  $\tilde{B}_k = \tilde{A} - \tilde{A}_k =$   
337  $(A - A_k) + (A_k - \tilde{A}_k) - (A - \tilde{A})$ . Now,  $\Pi(A - A_k) = 0$ , by definition. Thus, using (6) and (5),  
338 the claim follows.

339 Note that our goal is not to reason about the eigenvalues of  $\tilde{A}_k$ , but the eigenvalues of  $\tilde{A}_t$ , where  
340  $t \geq k$ . To this end, we define  $B' = \frac{1}{m} \sum_{i \in [m]} (\hat{A}_t^{(i)} - \hat{A}_k^{(i)})$ . By definition, we have  $B' = \tilde{A}_t - \tilde{A}_k$ .

341 Now, let us relate  $B'$  and  $\tilde{B}_k$ . Note that for any machine,  $\hat{A}_t^{(i)} - \hat{A}_k^{(i)} \preceq \hat{A}^{(i)} - \hat{A}_k^{(i)}$ , by definition.  
342 Thus by taking averages, we have that  $B' \preceq \tilde{B}_k$ .

343 We will now argue that with probability  $\geq 1 - \delta$ ,

$$B' = \Pi^\perp B' \Pi^\perp + E, \quad \text{where } \|E\| \leq O(\kappa) \log(1/\delta). \quad (7)$$

344 To see this, let us expand the first term on the RHS using  $\Pi^\perp = (I - \Pi)$ :

$$\Pi^\perp B' \Pi^\perp = B' - B' \Pi - \Pi B' + \Pi B' \Pi.$$

345 Now, since  $B' \preceq \tilde{B}_k$ , we have  $\|B' \Pi\| \leq \|\tilde{B}_k \Pi\| \leq O(\kappa) \log(1/\delta)$ , by the earlier claim. Thus the  
346 last three terms are all bounded in norm by  $O(\kappa) \log(1/\delta)$ , and hence we have the desired bound on  
347  $\|E\|$ .

348 Putting (6) and (7) together, we have that with probability at least  $1 - \delta$ ,

$$\tilde{A}_t = \tilde{A}_k + B' = A_k + \Pi^\perp B' \Pi^\perp + E', \quad \text{where } \|E'\| \leq O(\kappa) \log(1/\delta).$$

349 Now, because  $A_k$  and  $\Pi^\perp B' \Pi^\perp$  are in orthogonal spaces, the eigenvalues of  $A_k + \Pi^\perp B' \Pi^\perp$  are  
350 precisely the union of the eigenvalues of the two matrices. The eigenvalues of  $A_k$  are simply

351  $\lambda_1, \dots, \lambda_k$ . We claim that  $\lambda_{\max}(B') \leq \lambda_{k+1} + O(\kappa \log(1/\delta))$ , with probability at least  $(1 - \delta)$ .  
 352 This can be shown as follows. First, since  $B' \preceq \tilde{B}_k$ , it suffices to bound  $\lambda_{\max}(\tilde{B}_k)$ . Since  $\tilde{B}_k =$   
 353  $(A - A_k) + (A_k - \tilde{A}_k) - (A - \tilde{A})$ , using (5) and (6), it follows that with probability at least  $1 - \delta$ ,

$$\lambda_{\max}(\tilde{B}_k) \leq \lambda_{\max}(A - A_k) + O(\kappa \log(1/\delta)) = \lambda_{k+1} + O(\kappa \log(1/\delta)).$$

354 Thus, due to the gap between  $\lambda_k$  and  $\lambda_{k+1}$ , the top  $k$  eigenvalues of  $A_k + \Pi^\perp B' \Pi^\perp$  are exactly  
 355  $\lambda_1, \dots, \lambda_k$ . Thus by Weyl's inequality, the eigenvalues of  $\tilde{A}_t$  satisfy (3). This completes the  
 356 proof.  $\square$
